# Supplementary material for: Liquid Formulation of AbobotulinumtoxinA: A 6-Month, Phase 3, Double-Blind, Randomized, Placebo-Controlled Study of a Single Treatment, Ready-to-Use Toxin for Moderate-to-Severe Glabellar Lines
Source: PubMed Central journal article supplement — Aesthet Surg J. 2019 Mar 20;40(1):93–104. doi: 10.1093/asj/sjz003 (PMC6923737; doi:10.1093/asj/sjz003), 2019-03-20
Supplement: sjz003_suppl_supplemental_material.pdf [file sjz003_suppl_supplemental_material.pdf]

## **Supplemental Material**

Liquid Formulation of AbobotulinumtoxinA: A 6-Month, Phase 3, Double-Blind, Randomized, Placebo-Controlled Study of a Single Treatment, Ready-to-Use Toxin for Moderate-to-Severe Glabellar Lines

Benjamin Ascher, MD, Berthold Rzany, MD, Sc.M, Philippe Kestemont, MD, Said Hilton, MD, Marc Heckmann, MD, Isaac Bodokh, MD, Ernst Magnus Noah, MD, PhD, Dominique Boineau, MD, Martina Kerscher, MD, Magali Volteau, PhD, Philippe Le Berre, MD, Philippe Picaut, PharmD

*Aesthetic Surgery Journal* 2019, DOI: 10.1093/asj/sjz003

**Supplemental Table 1. Duration of treatment response based on (A) ILA and (B) SSA at maximum frown**

| Interval, days postinjection                                         | ASI 50 U<br>(N=125)                 |                                      |                                        |
|----------------------------------------------------------------------|-------------------------------------|--------------------------------------|----------------------------------------|
|                                                                      | Subjects at start of interval,<br>n | Non-responders during interval,<br>n | Cumulative % (95% CI) of<br>responders |
| <b>A. Duration of treatment response, ILA of GL at maximum frown</b> |                                     |                                      |                                        |
| 0-30                                                                 | 113                                 | 0                                    | 100 [100; 100]                         |
| 30-60                                                                | 112                                 | 14                                   | 88 [80; 92]                            |
| 60-90                                                                | 98                                  | 19                                   | 71 [61; 78]                            |
| 90-120                                                               | 78                                  | 20                                   | 52 [43; 61]                            |
| 120-150                                                              | 58                                  | 26                                   | 29 [43; 61]                            |
| 150-180                                                              | 31                                  | 18                                   | 5 [1; 13]                              |
| <b>B. Duration of treatment response, SSA of GL at maximum frown</b> |                                     |                                      |                                        |
| 0-30                                                                 | 100                                 | 4                                    | 96 [90; 98]                            |
| 30-60                                                                | 95                                  | 11                                   | 85 [76; 91]                            |
| 60-90                                                                | 84                                  | 18                                   | 67 [56; 75]                            |
| 90-120                                                               | 66                                  | 18                                   | 48 [38; 58]                            |
| 120-150                                                              | 47                                  | 10                                   | 38 [28; 47]                            |
| 150-180                                                              | 36                                  | 12                                   | 15 [5; 31]                             |
| 180-210                                                              | -                                   | -                                    | -                                      |

Non-responders were defined as subjects who re-exhibited a severity grade of 2 or 3 during the interval. Cumulative percentage are Kaplan-Meier estimates. Discrepancies between the number of subjects at the start of each interval and the number of non-responders during the previous interval are due to subject who withdrew during an interval, without re-exhibiting a severity grade of 2 or 3.

ASI, abobotulinumtoxinA solution for injection; CI, confidence interval; GL, glabellar lines; ILA, investigator' live assessment; SSA, subject's self-assessment.
